# Supplementary material
Source: PubMed Central journal article supplement (PMC4017936)
Supplement: NIHMS572942-supplement-Supplementary_Data.pdf [file NIHMS572942-supplement-Supplementary_Data.pdf]

## SUPPLEMENTARY INFORMATION

### **Auto-Regulatory RNA Editing Fine-Tunes mRNA Re-Coding and Complex Behavior in *Drosophila***

Yiannis A. Savva<sup>1\*</sup>, James E.C Jepson<sup>1,2\*</sup>, Asli Sahin<sup>1</sup>, Arthur U. Sugden<sup>1</sup>, Jacquelyn S. Dorsky<sup>1</sup>,  
Lauren Alpert<sup>3</sup>, Charles Lawrence<sup>3</sup> & Robert A. Reenan<sup>1</sup>

<sup>1</sup>Department of Molecular Biology, Cell Biology and Biochemistry, Brown University. <sup>2</sup>Current address: Department of Neuroscience, Thomas Jefferson University, Philadelphia, PA, 19107, USA. <sup>3</sup>Department of Applied Mathematics, Brown University, Providence, RI, 02912, USA.

\*These authors contributed equally to this work. Correspondence should be addressed to R.A.R.

(robert\_reenan@brown.edu)

#### **Table of contents**

Supplementary Figures S1-S8

Supplementary Tables S1-S2

**Supplementary Figure S1 | Conserved RNA editing sites.** Shown below are the editing sites in the 23 mRNAs analyzed in this study, alongside the surrounding local sequence. Sensitivity to dADAR auto-editing was defined based on data from male heads.

\*= intron location

A= editing site

A= non-sensitive site

A= G-sensitive site

A= S- and G-sensitive site

**syt (CG3139)**

TTGAAGAAGATGGACGTGGGCGGATTGTCTG\*ATCCATATGTGAAA<sup>1</sup>TTGCAATCA  
TGCAAAATGGCAAACGTTTGAAAAAGA<sup>2</sup>GAAGACAAGT<sup>3</sup>TCAA<sup>5</sup>A<sup>6</sup>AAATGCACCC  
TCAACCCTTACTATAATGAGTCGTTCTCATTGGAAGTACCATTGGAACAAAT<sup>4</sup>CAA\*  
AAAATCTGTCTCGTTGTGACCGTCGTGGACTACGATCGTATTGGCACCTCCGAACCC  
ATCGGCCGCTG

**cap (CG33653)**

GACACAAGGTCTAAGCGGTAAACTT<sup>1</sup>TGTCTGTGCTAGAGTCGACTTTGTC

**cpx (CG32490)**

AACTGAAAAATCAAAT<sup>1</sup>GAAACGCAAGTAA<sup>2</sup>A<sup>3</sup>TGAGCTAAAAACTCAAATAGAGG  
GAAAATGTGTCATGCAGTGA

**unc (CG2999)**

ACGCAATTGACGCAGTGTTTCGATGTTGTT<sup>1</sup>GCAAACCTCGAGTGTCTGATCCAGA  
AATTGGA

**stn (CG40306)**

GTTTACTATGCCCCGCCACGCAGGTCTCCCAT<sup>1</sup>CCACCGTGCGCTCGGTGAGTGTCCA  
GGATTCCGGATGGCGATGAACCGC

**lap (CG2520)**

ACTAGCAGCGGTGCTGCTGGCGCTAGCGCTGCACTA<sup>1</sup>CAAATCCATTTCTATCGTC  
GCCGCCAGCCGCGCAGGCTGGCCAGCCGAT<sup>2</sup>GTTGATCTGTTCCGGTGCCGCGTCCG

**dsc (CG34405)**

TATGAAGGAGGAGTGTTGGAA<sup>A</sup><sup>1</sup>TGTTTCTCACCGAATCTCAAAAACACTA

**sbd (CG6798)**

GCCCAGCGATTTCGGGCGAAAAG<sup>G</sup><sup>1</sup>GTT<sup>A</sup><sup>1</sup>CGTT<sup>A</sup><sup>2</sup>TGTATTTCGATACTCGTGTC

**stj (CG12295)**

TTCAATGTTGGGACAGAGGCTAGAT<sup>A</sup><sup>1</sup>TCGCAAAGCATGTTGTCAATACGATATTAG  
GTACAAATGACTTTGTGAAC<sup>A</sup><sup>2</sup>TCTTCACCTTTGATAAGGAAGTGAG

ACTGAAAGAAGGGATTGAACTGTTT<sup>A</sup><sup>3</sup>GACCCAAATCGATCGCCAATTATAC

**cat (CG15899)**

GGTGGCCATTTTGGTTGAGGGATTC<sup>A</sup><sup>1</sup>G TTCAGAG<sup>G</sup><sup>1</sup>CGAAATGAACGTCGCGA

**cad (CG4894)**

CAGCGGAATGTGTTATGAAAATTTT<sup>A</sup><sup>1</sup>G CATATGGTTTTGTGTTACAT<sup>A</sup><sup>2</sup>ATGGTGCA  
TATCT<sup>A</sup><sup>3</sup><sup>A</sup><sup>4</sup>GAAATGGATGGAATTTATTAGATTTTATTAGATTTTACAATTGTAGTTAT  
<sup>A</sup><sup>5</sup>GG<sup>G</sup><sup>1</sup>GGCGATAAGTACTGCACTCTCCC

**shb (CG1066)**

GGTGGTGCAGGTCTTTCGCATCATGCGCATCCTGCG<sup>A</sup><sup>1</sup><sup>A</sup><sup>2</sup>TCCTTAAGCTGG  
CCCGTCACTCAACGGGCCTG

TCGTTTCAATACCGGAA<sup>A</sup><sup>3</sup>CATTTTGGTGGGCGGGTATTACAATGACAACCT  
GTTGGCTACGGGGACATCT<sup>A</sup><sup>4</sup>TCCCACTGCACTGGGAAAGGTTATTGGT<sup>A</sup><sup>5</sup>C

CTGTGTGTTGCATATGCGGTGTTCTGGT<sup>A</sup><sup>6</sup><sup>A</sup><sup>7</sup>TCGCTTTCCTATTCCCA  
TCATCGTTAACAATTTTGCTGAATTTTATAAGAATCAG

**eag (CG10952)**

TCGCCGCGGAGACAGACAACGAGA<sup>A</sup><sup>1</sup>GGTGTTCACCATCTGCATGATGATC  
CTGGATACCGAGAAG\*<sup>G</sup>TA<sup>A</sup><sup>2</sup>CTAACT<sup>A</sup><sup>2</sup>TTGTCCGAAAGATATGAAGGCTGAC  
TATGTGTTTCATCTAAATCGCAAAGT<sup>A</sup><sup>5</sup>TTT<sup>A</sup><sup>4</sup>ACGAGCATCCGGC<sup>A</sup><sup>5</sup>TTTCGTCTGGCC  
TCGGATGGTTGTC  
CTCAGACATCGACTGATTTTTTCGCA<sup>A</sup><sup>6</sup>GGTGGCCGATGTGAAGCGCGAAAAA  
GTGATTTGCATGCCATCAAACGTGATA<sup>A</sup><sup>7</sup>AATTGCTCGAAGTCCTCGATTTCT

**slo (CG10693)**

GA<sup>A</sup><sup>1</sup>ACTCTGGCGATCCGCTGGATTTT<sup>A</sup><sup>1</sup>ATAATGCTCATCGTTTATCGTATTG  
CATGATAACAG\*<sup>A</sup>AACTGGTCAATGATA<sup>A</sup><sup>2</sup>GTAACGTGCAGTTTCTCGATCAAGA

**rdl (CG10537)**

GTCAATTTTGGACCGATCCTCGTTT<sup>A</sup><sup>1</sup>GCGTAT<sup>A</sup><sup>2</sup>GAAAACGACCTGGTGTAGAAACA  
CT  
CTACATACCCTCTGGACTGATCGTT<sup>A</sup><sup>3</sup>TTATATCATGGGTATCATTTTGGCTATGGGT  
ATCATTTTGGCTCAATCGC<sup>A</sup><sup>4</sup>ATGCAACGCCGGCGCGTGTGGCGCT  
GTCGGCTACATGGCAAACGAATTCA<sup>A</sup><sup>5</sup><sup>A</sup><sup>6</sup>TGCGAAAACAAAGATTTATGGCGAT

**daf (CG32975)**

CTACTTCCGATGCGGTGCCATTGCTGG\*<sup>G</sup>TA<sup>A</sup><sup>9</sup>CATATTTCAATTGCATAATGTTTATG  
GTAGCTTCATCCGTTGTGTCAACGATTTT<sup>A</sup><sup>1</sup><sup>A</sup><sup>2</sup>TATTAAATTATCATCATCGAAATGC  
TGACAGACTGTGCCTTATCATATTCACAATGTTCA<sup>A</sup><sup>3</sup>CAA<sup>A</sup><sup>4</sup>TATT<sup>A</sup><sup>5</sup>GCCACAAT<sup>A</sup><sup>6</sup>GCT  
GTACTACT<sup>A</sup><sup>7</sup>TC<sup>A</sup><sup>8</sup>GCACCACATATTATTGTCTCGT

**das (CG4128)**

GGATTCGATGGCACGTATCACACCAA<sup>A</sup><sup>1</sup>CA<sup>A</sup><sup>2</sup>TTGTGGTCAAACAT<sup>A</sup><sup>3</sup><sup>A</sup><sup>4</sup>CGGCAG  
TTGTCTGTACGTGCCCCCT

GTATCTTCAAGAGCACATGCAAGATA<sup>5</sup>GACATCACGTGGTTCCCATTTGATG  
GGAAATCAG\*TTGGATTTGGTTTTGA<sup>6</sup>TTCCGAAGATGGAGGGGATCTTTC

**ard (CG11348)**

AGAATATGACACAAAAAGTTGGAGT<sup>1</sup><sup>2</sup>GATTTGGTTTGGCGTTCGTACAGCT  
TAATCAATGTC\*AATGAGAAAAATCA<sup>3</sup><sup>4</sup>TTATGAAATCAAACGTTTGGTTACG

**sha (CG12348)**

ATGTCCCTTTAGACGTATTTAGTGAAGAAATA<sup>1</sup><sup>2</sup>ATTTTATGAATTAGGTGATCAA  
GCA  
CGAATCAGGCTATGTCCTTGGCAAT<sup>3</sup>TTACGAGTGATACGATTAGTTCGAG  
AAAATTGTCGGCTCTTTGTGCGTG<sup>4</sup>TCGCTGGTGTGCTGACAATCGCACT  
TTTCAATTACTTCTATCACCGCGAA<sup>5</sup>CGGATC<sup>6</sup>GGAGGAGATGCAGAGCCA

**adr (CG12598)**

CAGCACCTTGTGGGGATGCACGGATATTT<sup>1</sup>GTCCTCACGAAAACGACACTGGTGT  
GATAAAC

**cac (CG1522)**

TTCAACCGATTTGATTGCGTTGTCATT<sup>1</sup>GTGGTTCGATATTCGAAGTGATCTGGTCC  
G  
ATGCCCAAGAACTAACAGCAGCCGAAGAGG<sup>2</sup>ACAA<sup>13</sup>GTCGAA<sup>3</sup>GAGGATAAAGAG  
AAACAACCTGCAGGAGC  
ACCCTGGCAGCTATTTAAGAGAATTCTGGA<sup>4</sup>TATTATGGATGCTGTGGTCGTTATAT  
GCGC  
GCGTCGTGAACTCATTGAAAAATGTTGTAA<sup>5</sup>CATTCTAATCGTGTACATATTGTTTC  
AATT  
AATGGAAAATTTTTTTTATTGTACGGACGAA<sup>6</sup>GTAACATACTTCCGCAGAGTGCCA\*  
GGGCT

CATGATATCGGGTTCTCCGATACCGTATCTA<sup>11</sup> ATGTTGTAGAGATGGTCAAGGAGAC  
TCGTC

AGGCATGGCAACAGTCATCCGCGGTATCCA<sup>12</sup> GAG\*<sup>6</sup> GTTCATGGTCAGCATCGACA  
AGTCCGG

**par (CG9907)**

CAATTTACGACTGAAAAC<sup>3</sup>TTTC<sup>4</sup> TTAATTGA<sup>5</sup><sup>6</sup>ATAAATATTTTGAAACAGCT  
GTTATCACTATG

**glu (CG7535)**

CACTAGCAAATAATGCCAA<sup>1</sup> A<sup>2</sup> TAAATTTCCGAGAAAAGGAGAAAAAAGTC  
GCCTCAAAGTCGATCTACTATTCA<sup>3</sup> GCGAGAATTCTCATATTACTTAATACAAATT

**dop (CG18314)**

AACTGCTCTGGCTGAAA<sup>1</sup> TTTA<sup>2</sup> TCGAACCC<sup>3</sup> T<sup>4</sup> GTCATA<sup>10</sup> TGATGTCATTTCGCATTA<sup>4</sup>  
GTCTTTGCATTCTGGGTGTCTGGCTGCCATGGATTCTG

TGCTTAACCATTTGTTGTAAGACTA<sup>5</sup><sup>6</sup> GGGCCGTTTGCAAGCAGAGCTA<sup>7</sup><sup>8</sup> TCGGGT  
TGGACCCAGATGACTA<sup>9</sup> GAGTTAGATTTAGATTTTCATTCTCC

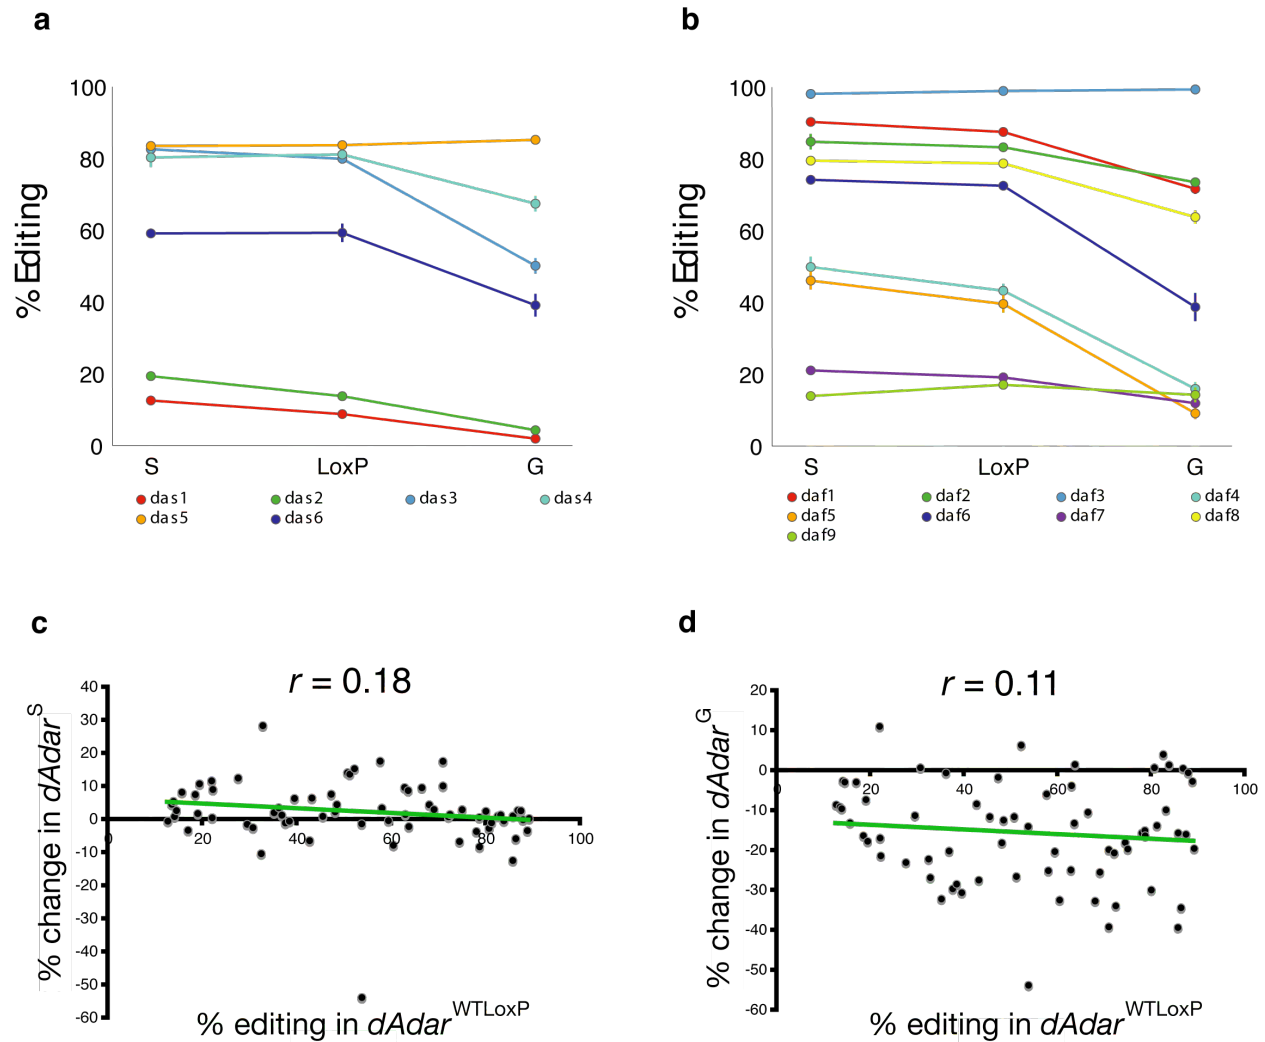

**Supplementary Figure S2 | Effects of altering dADAR auto-editing are not biased to sites with high or low editing levels. (a)** Six editing sites in the *Da6* acetylcholine receptor transcript show differential regulation in *dAdar*<sup>S</sup> and *dAdar*<sup>G</sup> when compared to *dAdar*<sup>WTLoxP</sup>. One site in *Da6* shows no alteration, three sites show a mono-directional alteration, and two sites show a bi-directional alteration in response to abolishing or hard-wiring *dAdar* auto-editing. **(b)** Nine editing sites in the *Da5* acetylcholine receptor transcript show differential regulation in *dAdar*<sup>S</sup> and *dAdar*<sup>G</sup> when compared to *dAdar*<sup>WTLoxP</sup>. Two sites in *Da5* show no alteration, five sites show a mono-directional, and two sites a bi-directional alteration upon changes in *dAdar* auto-editing. mRNAs were amplified from male head cDNA. Mean values for each site were defined as significantly different ( $P < 0.05$ ) from *dAdar*<sup>WTLoxP</sup> using one-way ANOVA with Dunnett post-hoc test ( $n = 3-8$  PCRs per site). Error bars, s.e.m. **(c-d)** For all sites analyzed with editing levels between 10-90%, increased editing in *dAdar*<sup>S</sup> males heads **(c)** and reduced editing in *dAdar*<sup>G</sup> male heads **(d)** are not correlated with the endogenous level of editing for each site in *dAdar*<sup>WTLoxP</sup> male heads.

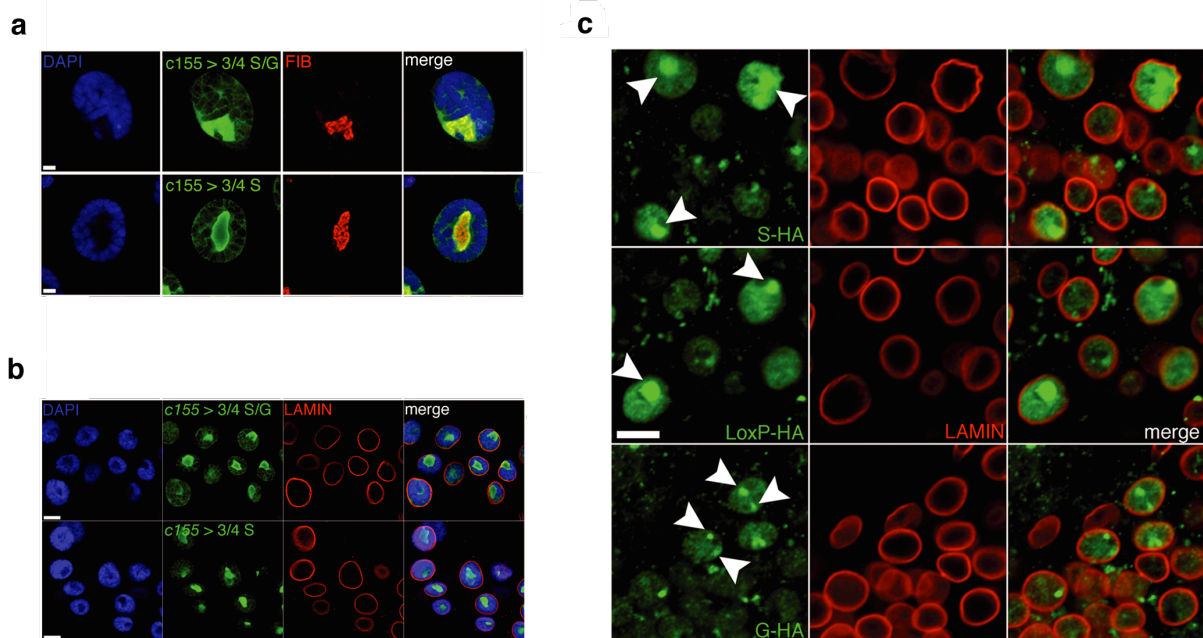

**Supplementary Figure S3 | dADAR localization in 3<sup>rd</sup> instar larval salivary glands and adult neurons.** (a) Two separate transgenes representing the predominant adult-stage isoforms of dADAR, which lacks the alternatively spliced 3a exon<sup>23</sup> (termed ‘3/4’) were expressed in larval salivary glands using the *elav<sup>c155</sup>*-Gal4 driver. At the auto-editing site, the serine codon was either wild-type (AGT) (‘S/G’) and is capable of being edited by the dADAR transgene, or was mutated to an un-editable synonymous TCT codon (‘S’). When expressed in the *dAdar* null adult nervous system, the wild-type dADAR transgene is robustly auto-edited<sup>23</sup>. Both the 3/4 S/G (upper panels) and the 3/4 S transgene (lower panels) primarily co-localized with the nucleolus, labeled with an anti-fibrillar (FIB) antibody. Scale bar, 5  $\mu$ m. (b) Both the 3/4 S/G (upper panel) and the 3/4 S (lower panel) transgenes localize internally to the nuclear envelope (labeled with an anti-Lamin antibody) in 3<sup>rd</sup> instar larval salivary glands. Scale bars, 20  $\mu$ m. (c) In adult neuronal nuclei, WTLoxP-HA, S-HA and G-HA dADARs also localize to within the nuclear envelope. Arrows indicate the primary concentrations of nuclear dADAR. Note the presence of multiple punctae within the nucleus in neurons expressing G-HA dADAR, but not S-HA dADAR. Scale bar, 5  $\mu$ m.



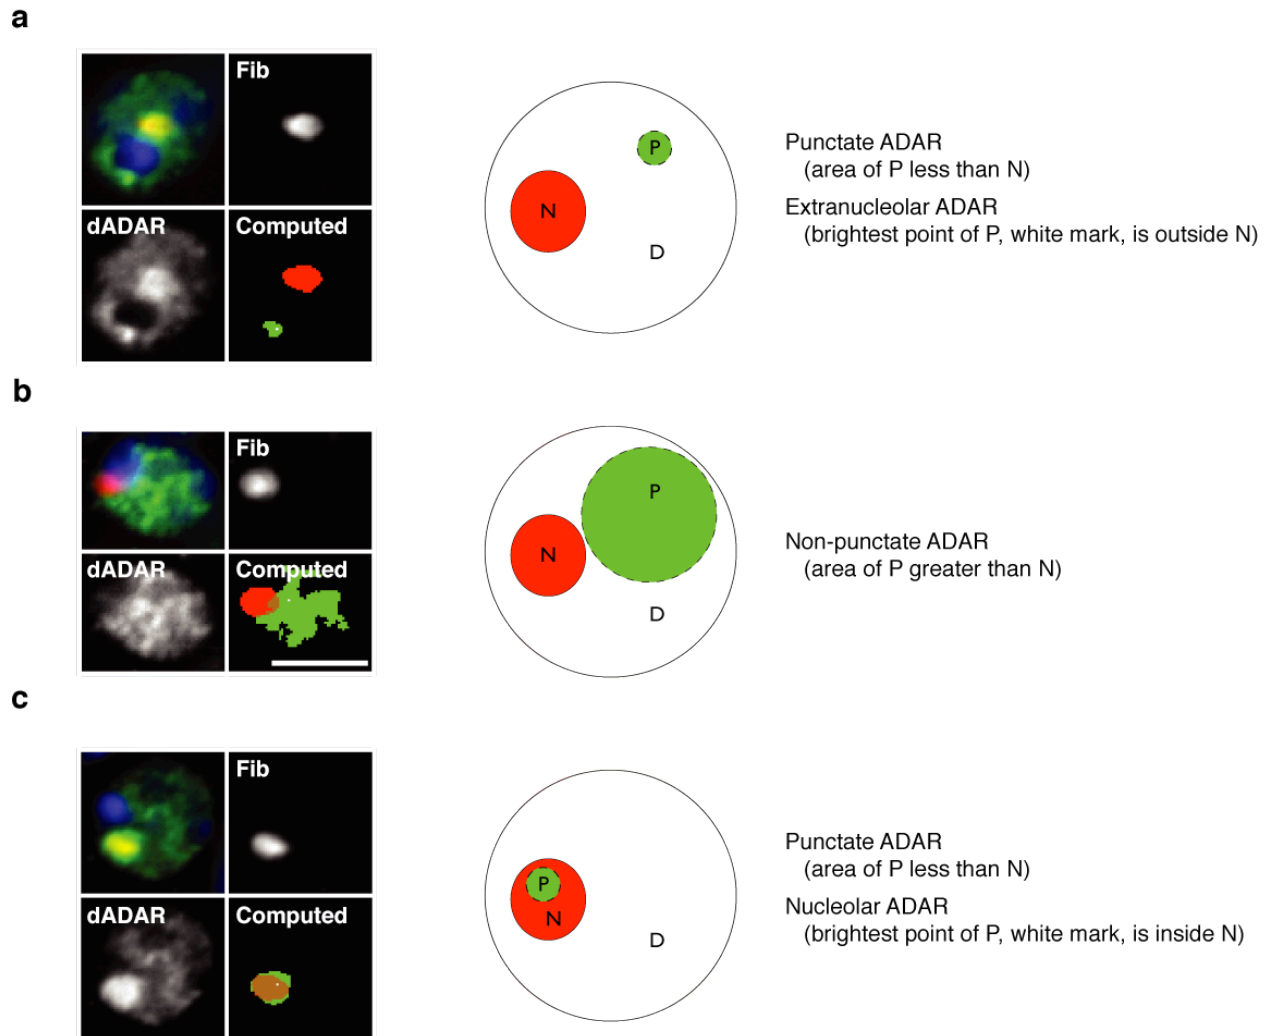

**Supplementary Figure S4 | Computational analysis of dADAR localization in adult neurons.** Automated categorization of extranucleolar punctate dADAR staining. Each category contains an example image, a model of its category, and the definition of the category. The tetrad of images show a merged image with DAPI (blue), dADAR (green), and fibrillar (red), the individual dADAR and fibrillar channels, and the computer's identification of the nucleolus and puncta. The computer's identification shows measures A (white), P (green), and N (red) as described in the methods. Next is a model of the computer's categorization of the cell followed by the definitions of that category. **(a)** Extranucleolar punctate dADAR staining. **(b)** Non-punctate dADAR staining. **(c)** Punctate non-extranucleolar dADAR staining. Scale bar, 5  $\mu\text{m}$ .

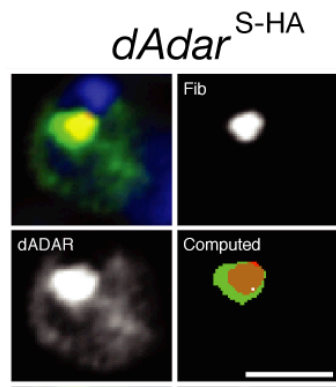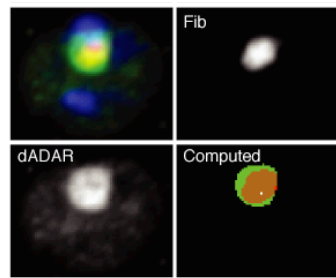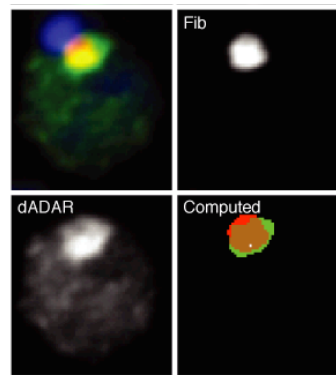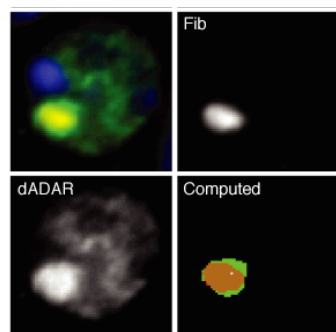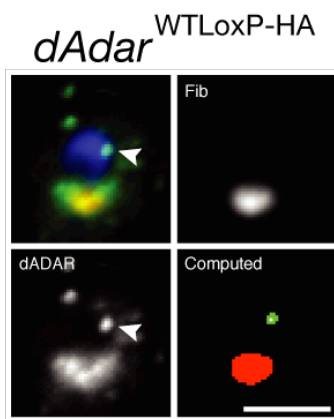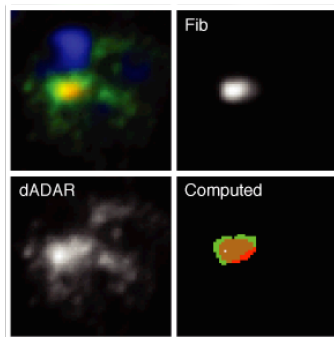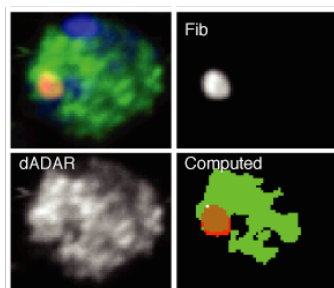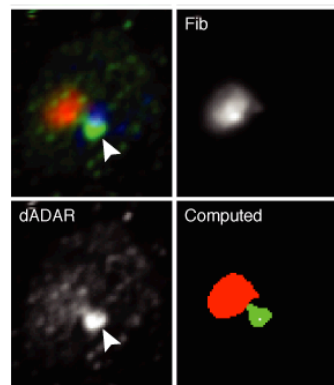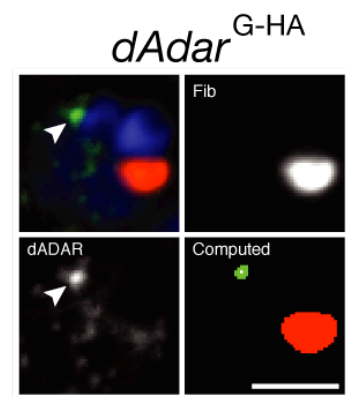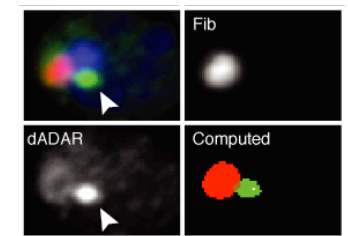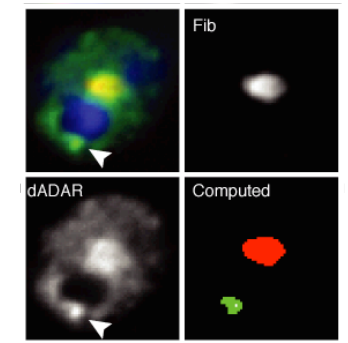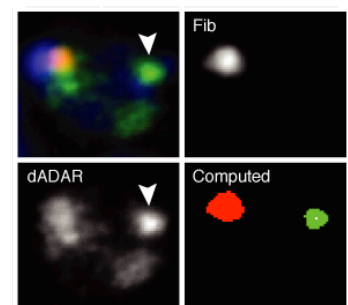

(on previous page)

**Supplementary Figure S5 | Examples of dADAR localization in *dAdar*<sup>S-HA</sup>, *dAdar*<sup>WTLoxP-HA</sup> and *dAdar*<sup>G-HA</sup> adult neurons.** For each example, confocal slices showing individual dADAR (green) and Fibrillarin (red) signals, alongside merged image with DAPI (blue), are shown, as well as the computed signals for dADAR and Fibrillarin. dADAR in *dAdar*<sup>S-HA</sup> neurons is predominantly localized to the nucleolus and extranucleolar puncta are rarely observed, while in *dAdar*<sup>G-HA</sup> neurons, strong extranucleolar puncta are frequently observed (arrowheads). Wild-type *dAdar*<sup>WTLoxP-HA</sup> controls exhibit an intermediate phenotype, although dADAR is mainly non-punctal. Scale bars, 5  $\mu$ m.

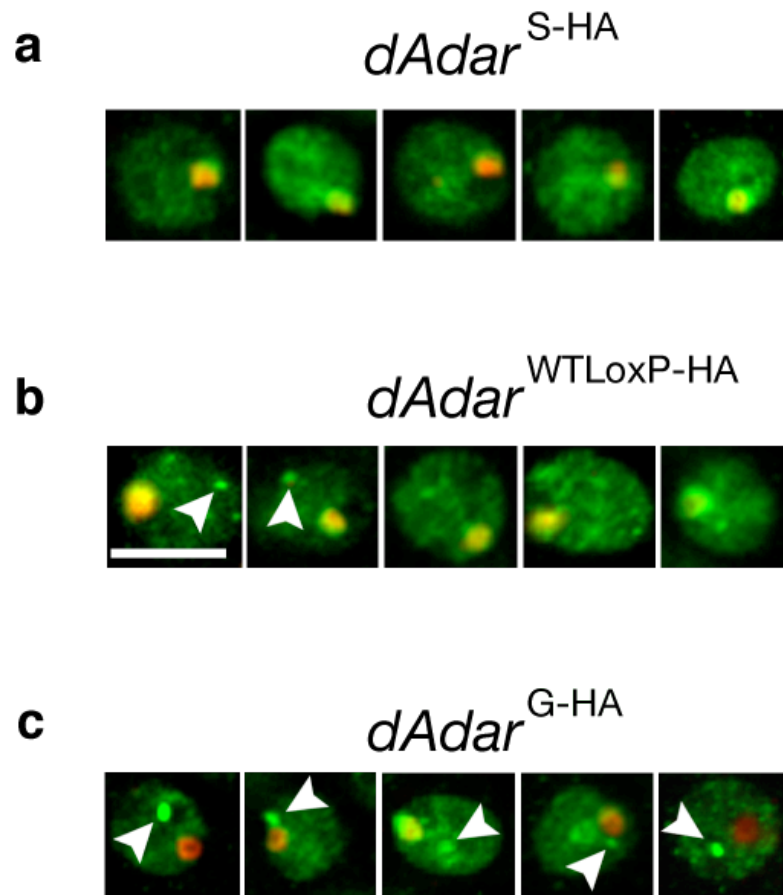

**Supplementary Figure S6 | Additional images of differences in dADAR localization following manipulation of dADAR auto-editing.** In each case, 5 representative adult neuronal nuclei are shown. dADAR (green) was visualized using a mouse anti-HA antibody, rather than the rabbit anti-HA antibody used for all other confocal experiments in the adult brain. **(a)** Consistent with the data obtained using the rabbit anti-HA antibody,  $dADAR^{S-HA}$  stained with mouse anti-HA shows a generally diffuse pattern of expression within the nucleus, and co-localizes with fibrillar (red). **(b)** This pattern was also predominantly observed in  $dADAR^{WTLoxP-HA}$  neurons, although small puncta were sometimes observed. **(c)** In  $dADAR^{G-HA}$  neurons, we additionally observed strong extranucleolar puncta (arrowheads), as was similarly seen using the rabbit anti-HA antibody. Scale bar, 5  $\mu$ m.

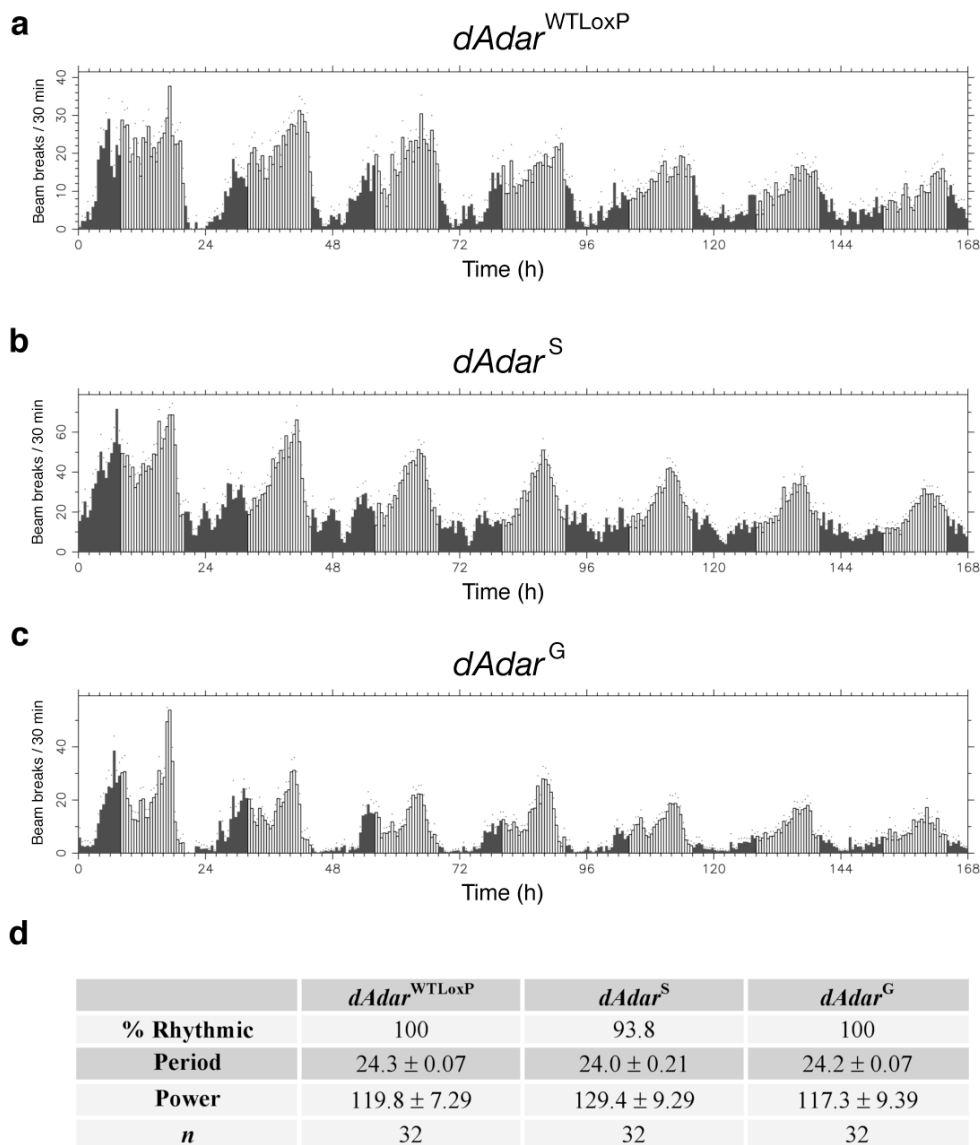

**Supplementary Figure S7 | Altering *dAdar* auto-editing does not result in arrhythmic behavior in constant-dark (DD) conditions. (a-c)** For each genotype indicated, activity plots were averaged over seven days in DD. Males bearing all *dAdar* alleles exhibited rhythmic locomotor patterns. Light bars - subjective day, dark bars – subjective night. Dots represent s.e.m. **(d)** Table indicating % rhythmicity, period and the power of rhythmicity for all genotypes. Values are presented as mean  $\pm$  s.e.m. *n*-values are also indicated.

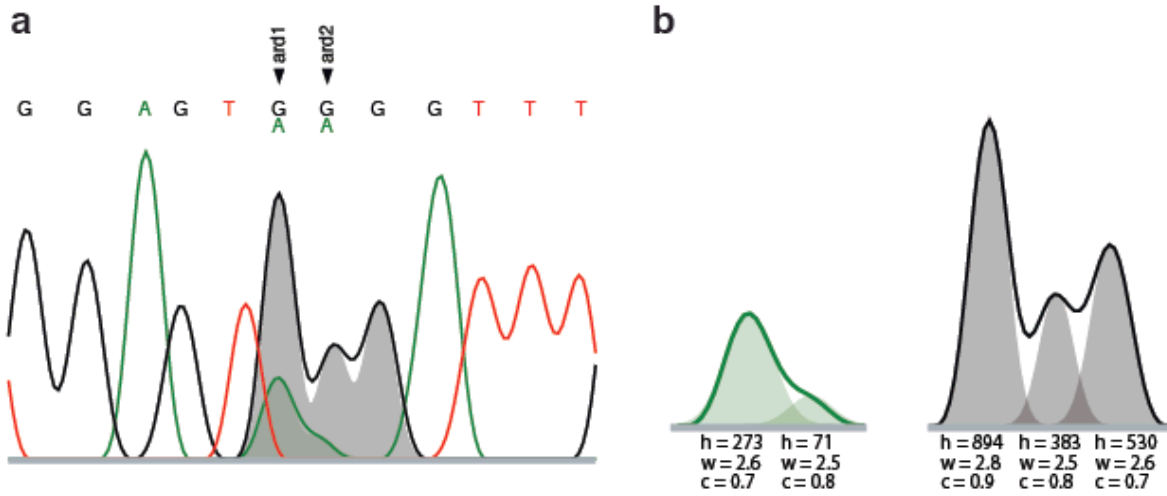

**Supplementary Figure S8 | Computational methods to determine editing levels.** (a) Example electropherogram showing the edited adenosines ard1 and ard2 (sites 1 and 2 of the *ard* acetylcholine receptor), in which the best fit Gaussian curves for the A and G residues are shown as filled green and black, respectively. (b) A and G chromatograms on the left and right in which each best fit Gaussian curve and its parameters are shown.

**Supplementary Table S1 | Nomenclature for the 23 transcripts analyzed in various *dAdar* allelic backgrounds.** Sites (1, 2...) are labeled in a 5' to 3' order within the transcript.

| <b>Abbreviation</b> | <b>Locus</b>                 | <b>Synonyms/ full name</b>                          | <b>Molecular function</b>                          |
|---------------------|------------------------------|-----------------------------------------------------|----------------------------------------------------|
| <b>adr</b>          | <i>dAdar</i>                 | <i>Drosophila adenosine deaminase acting on RNA</i> | RNA editing enzyme                                 |
| <b>ard</b>          | <i>Ard</i>                   | nAcR $\beta$ -64B                                   | Nicotinic acetylcholine receptor $\alpha$ -subunit |
| <b>cac</b>          | <i>cacophony</i>             | Dm $\alpha$ 1A                                      | Voltage-gated calcium channel $\alpha$ -subunit    |
| <b>cad</b>          | <i>Ca-alpha1D</i>            | Dm $\alpha$ 1D                                      | Voltage-gated calcium channel $\alpha$ -subunit    |
| <b>cap</b>          | <i>caps</i>                  | Calcium activated protein for secretion             | Regulator of exocytosis                            |
| <b>cat</b>          | <i>Ca-alpha1T</i>            | Dm $\alpha$ 1T                                      | Voltage-gated calcium channel $\alpha$ -subunit    |
| <b>cpx</b>          | <i>complexin</i>             |                                                     | Regulator of exocytosis                            |
| <b>daf</b>          | <i>D<math>\alpha</math>5</i> | nAcR $\alpha$ -34E                                  | Nicotinic acetylcholine receptor $\alpha$ -subunit |
| <b>das</b>          | <i>D<math>\alpha</math>6</i> | nAcR $\alpha$ -30D                                  | Nicotinic acetylcholine receptor $\alpha$ -subunit |
| <b>dop</b>          | <i>DopEcR</i>                |                                                     | Dopamine/Ecdysteroid receptor                      |
| <b>dsc</b>          | <i>dsc1</i>                  | NaCP60E                                             | Voltage-gated sodium channel                       |
| <b>eag</b>          | <i>Eag</i>                   | <i>Ether-a-go-go</i>                                | Voltage-gated potassium channel $\alpha$ -subunit  |
| <b>glu</b>          | <i>GluCla</i>                |                                                     | Glutamate-gated chloride channel                   |
| <b>lap</b>          | <i>Lap</i>                   | like-AP180                                          | Regulator of endocytosis                           |
| <b>par</b>          | <i>para</i>                  | <i>paralytic</i>                                    | Voltage-gated sodium channel $\alpha$ -subunit     |
| <b>rdl</b>          | <i>Rdl</i>                   | <i>resistance to dieldrin</i>                       | GABA receptor $\alpha$ -subunit                    |
| <b>sbd</b>          | <i>Sbd</i>                   | nAcR $\beta$ -96A                                   | Nicotinic acetylcholine receptor $\beta$ -subunit  |
| <b>sha</b>          | <i>shaker</i>                |                                                     | Voltage-gated potassium channel $\alpha$ -subunit  |
| <b>shb</b>          | <i>shab</i>                  |                                                     | Voltage-gated potassium channel $\alpha$ -subunit  |
| <b>slo</b>          | <i>slowpoke</i>              |                                                     | Ca <sup>2+</sup> -activated potassium channel      |
| <b>stj</b>          | <i>straightjacket</i>        | $\alpha$ 2 $\delta$                                 | Voltage-gated calcium channel                      |
| <b>stn</b>          | <i>stoned-B</i>              |                                                     | Regulator of endocytosis                           |
| <b>syt</b>          | <i>synaptotagmin-1</i>       |                                                     | Regulator of exocytosis                            |
| <b>unc</b>          | <i>unc-13</i>                |                                                     | Regulator of exocytosis                            |

**Supplementary Table S2 | Primers used in this study**

| <b>Gene</b> | <b>CG Number</b> | <b>Sites</b> | <b>Primer Type</b> | <b>Se quence (5' - 3')</b>                               |
|-------------|------------------|--------------|--------------------|----------------------------------------------------------|
| syt         | CG3139           | 1 to 6       | Forward            | GCTGCGCTACGTGCCGACCGCCGG                                 |
|             |                  |              | Reverse Sequencing | GTAGTCCACGACGGTCACAACGAG<br>GCTGCGCTACGTGCCGACCGCCGG     |
| cap         | CG33653          | 1            | Forward            | GATTTGAAAAGAACGATGGGAAAG                                 |
|             |                  |              | Reverse Sequencing | CAGCATATTAATCTGCTGCGAATACC<br>CGGGTGTGCCACTTCTGAAGATTTAT |
| cpx         | CG32490          | 1 to 3       | Forward            | AGCTAAGCAGATGGTTGGAAA                                    |
|             |                  |              | Reverse Sequencing | TGCATGACACATTTTCCCTCT<br>CCCCAAGAAGAGCCCAAT              |
| unc         | CG2999           | 1            | Forward            | TGGACAGTTATCAGCATCTTCAA                                  |
|             |                  |              | Reverse Sequencing | ATTCGTGGCTCCAAACTGAT<br>GCTGTGGACATGAAGTACGC             |
| stn         | CG12473          | 1            | Forward            | TCAAGGGTATCGAGCGAATC                                     |
|             |                  |              | Reverse Sequencing | GGCCAAGATGCCTTTGATAA<br>TGCATACACCACACATCAGC             |
| lap         | CG2520           | 1 and 2      | Forward            | CGATGCGTTGGATCTTTACA                                     |
|             |                  |              | Reverse Sequencing | GGACAGCCAAGTATGATGGG<br>TTGTTAGATGCCTTGGAGCA             |
| dsc         | CG34405          | 1            | Forward            | GCAAGGAATGCGGATTGTAG                                     |
|             |                  |              | Reverse Sequencing | GCGTTGCTCACTTCCAGAAT<br>CGGATCGTTCTTCACACTGA             |
| sbd         | CG6798           | 1 and 2      | Forward            | GACCTACAATGGTGCCCAAG                                     |
|             |                  |              | Reverse Sequencing | CACATCGATCTCGTTGGTGT<br>CCAAGTGGATCTGAAGCAT              |
| stj         | CG12295          | 1 to 3       | Forward            | CGTCCGGAATTCACAATAC                                      |
|             |                  |              | Reverse Sequencing | CCTCCTTGCCAATCAGGTAG<br>CGACGAGTCCGAAGGATATT             |
| cat         | CG15899          | 1            | Forward            | GTTGCTGCGAATCCTCAAAT                                     |
|             |                  |              | Reverse Sequencing | GTTGGTGGTCGAGGAGTCTG<br>TGTGGCACTAATGACGTTCCG            |
| cad         | CG4894           | 1 to 5       | Forward            | GCATCGATTCTATGGGCATT                                     |



|     |         |            |                    |                                                 |
|-----|---------|------------|--------------------|-------------------------------------------------|
|     |         |            | Reverse Sequencing | CAGTGGACGTAGCACTCGAA<br>TTGCCAACTGTATTGCCTTG    |
| shb | CG1066  | 1 to 7     | Forward            | GAAGGTAAATGCGCCGAGTA                            |
|     |         |            | Reverse Sequencing | GTCCGTTTGCGAGAGATTGT<br>GGAAACGAATAAGAATGCAACG  |
| eag | CG10952 | 1 to 5     | Forward            | CAATACAGCTGGCTGTGGAA                            |
|     |         |            | Reverse Sequencing | TCACCCTTCTCGACATCACTT<br>GACGGCCCTATATTTACCA    |
|     |         | 6 to 7     | Forward            | CAATACAGCTGGCTGTGGAA                            |
|     |         |            | Reverse Sequencing | TCACCCTTCTCGACATCACTT<br>GCGACGAAATTTGGAGAAGA   |
| slo | CG10693 | 1          | Forward            | CAGCATTGCATCCCTCATT                             |
|     |         |            | Reverse Sequencing | TGGTTCCTTGGAAGAACTCC<br>CGGTCTTCGATTTCTTCGAG    |
|     |         | 2          | Forward            | CTACCACGAGCTGAAACACG                            |
|     |         |            | Reverse Sequencing | CGGGTGGGTTGGTTATTACA<br>GATGACCTTTGACGACACGA    |
| rdl | CG10537 | 1 and 2    | Forward            | CATGCTGGGTGACGTAAACA                            |
|     |         |            | Reverse Sequencing | CATACCGACGCCACATT<br>CGGAGTCACCATGTATGTGC       |
|     |         | 3 to 6     | Forward            | CATGCTGGGTGACGTAAACA                            |
|     |         |            | Reverse Sequencing | CATACCGACGCCACATT<br>TGCCCCAATTTAAGGTCTTG       |
| daf | CG32975 | 1, 2 and 9 | Forward            | CACTGGGTGTTACCATCTTGC                           |
|     |         |            | Reverse Sequencing | CTACGAGACAATAATATGTGGTG<br>ACTGGGTGTTACCATCTTGC |
|     |         | 3 to 8     | Forward            | CACTGGGTGTTACCATCTTGC                           |
|     |         |            | Reverse Sequencing | CTACGAGACAATAATATGTGGTG<br>CGTGCATCAAATCATCAACT |
| das | CG4128  | 1 to 6     | Forward            | AATCTGCGCTGGAATGAAAC                            |
|     |         |            | Reverse Sequencing | CAATGTGAAGCCCAGTAGGG<br>TGGAATGAAACGGAATACGG    |
| ard | CG11348 | 1 to       | Forward            | GACCTACAATGGTGCCCAAG                            |

|     |         |               |                       |                                                      |
|-----|---------|---------------|-----------------------|------------------------------------------------------|
|     |         | 4             | Reverse<br>Sequencing | CACATCGATCTCGTTGGTGT<br>CCCAAGTGGATCTGAAGCAT         |
| sha | CG12348 | 1<br>and<br>2 | Forward               | CTGGTCATGGCTTTGGTGGCGGACC                            |
|     |         |               | Reverse<br>Sequencing | CCGTGTGATCAGTCAGACCTGGCG<br>GGATCTGTGATGTCAGGCACCTCG |
|     |         | 3 to<br>6     | Forward               | CTGGTCATGGCTTTGGTGGCGGACC                            |
|     |         |               | Reverse<br>Sequencing | CCGTGTGATCAGTCAGACCTGGCG<br>CGAGGTGCCTGACATCACAGATCC |
| adr | CG12598 | 1             | Forward               | CCACAGCATATCAGTCGATTT                                |
|     |         |               | Reverse<br>Sequencing | TGGAATCGTCCCCTCACCGGAC<br>CCACAGCATATCAGTCGATTT      |
| cac | CG1522  | 1             | Forward               | GCGGAGAAAAGGTTTCGTTT                                 |
|     |         |               | Reverse<br>Sequencing | GAGTGTTGCAAGACCTGTGG<br>TCAACAGTGCTATCGGGAAA         |
|     |         | 2 to<br>5     | Forward               | CCACAGCATATCAGTCGATTT                                |
|     |         |               | Reverse<br>Sequencing | TGGAATCGTCCCCTCACCGGAC<br>ATGCATTTACCGGCGTATTC       |
|     |         | 6             | Forward               | GTACGAGGAGGAGGACGAACTGC                              |
|     |         |               | Reverse<br>Sequencing | CTGAAGTCTAGCGGGACTCG<br>GTACGAGGAGGAGGACGAACTGC      |
|     |         | 11            | Forward               | GTACGAGGAGGAGGACGAACTGC                              |
|     |         |               | Reverse<br>Sequencing | CTGAAGTCTAGCGGGACTCG<br>CACTGGCCTACGCCTACTTC         |
|     |         | 12            | Forward               | GTACGAGGAGGAGGACGAACTGC                              |
|     |         |               | Reverse<br>Sequencing | CTGAAGTCTAGCGGGACTCG<br>CTCCAGTGGCCAGATCTCC          |
| par | CG9907  | 1 to<br>4     | Forward               | CATTGGTGCAAATCGAACAA                                 |
|     |         |               | Reverse<br>Sequencing | GCTCCGAATGGACATCTTCT<br>CATTATTCATGCACACGACGA        |
| glu | CG7535  | 1 to<br>2     | Forward               | GGCAGCGGACACTATTTCTG                                 |
|     |         |               | Reverse<br>Sequencing | GCATCTAAACTGGCCTGCTC<br>CTGACTATGGCGGGACCA           |
|     |         | 3             | Forward               | GGCAGCGGACACTATTTCTG                                 |
|     |         |               | Reverse<br>Sequencing | GCATCTAAACTGGCCTGCTC<br>CCTACCTCGCTTCACACTGG         |

|     |         |                  |            |                             |
|-----|---------|------------------|------------|-----------------------------|
| dop | CG18314 | $\frac{1}{9}$ to | Forward    | GGTGCCCTTCTCCGTGTAT         |
|     |         |                  | Reverse    | TTGAGGAGAATGAAAATCTAAATCTAA |
|     |         |                  | Sequencing | GACCGGAGAATGGATGTACG        |
